# Supplementary material for: Prevalence of Type 2 Diabetes in the States of The Co-Operation Council for the Arab States of the Gulf: A Systematic Review
Source: PLoS One. 2012 Aug 8;7(8):e40948. doi: 10.1371/journal.pone.0040948 (PMC3414510; doi:10.1371/journal.pone.0040948)
Supplement: Table S1 — Study quality assessment. (DOCX) [file pone.0040948.s003.docx]

| **Ref/dates of study** | **Quality assessment checklist (1)** |
| --- | --- |
| Al-Lawati &Jouilahti/ 1991 | 1-Y, 2-Y, 3-Y, 4-Y, 65-N, 6-N, 7-NA |
| Asfour et al/ 2000 | 1-Y, 2-Y, 3-Y, 4-Y, 5-N, 6-N, 7-NA |
| Al-Lawati et al/ NR  **Table S1: Study quality assessment** | 1-Y, 2-Y, 3-Y, 4-Y, 5-N, 6-N, 7-NA |
| Balasy & Radwan/ 19892; 9 | Full article not available for assessment |
| Townsend/ NR | 1-Y, 2-Y, 3-Y, 4-N, 5-Unclear, 6-N, 7-NA |
| Glasgow et al/ 1995 | 1-N, 2-partially, 3-N, 4-N, 5-N, 6-Y, 7-NA |
| El-Hazmi et al/ NR | 1-Y, 2- Incomplete, 3-Y, 4-Y, 5-Y, 6-N, 7-NA |
| Bacchus et al/ NR | 1-Y, 2-Incomplete, 3- Y, 4- Y, 5-N, 6- Some, 7-NA |
| Fatani et al/ NR | 1-Y, 2-Y, 3-Y, 4-Y, 5-N, 6-N, 7-NA |
| Anokute et al/ 1985-1987 | 1-Y, 2-Y, 3-Y, 4-Y, 5-Y, 6-N, 7-NA |
| Abu-Zeid and Al-Kassab/ 1989 | 1-Y, 2-Incomplete, 3-Y, 4-Y, 5-N, 6-N, 7-NA |
| Abdella et al/1989-1990 | 1-Y, 2-Y, 3-Y, 4-N, 5-Y, 6-N, 7-NA |
| Al-Lawati & Mohammed / 1991 | 1-Y, 2-Y, 3-Y, 4-Y, 5-N, 6-N, 7-NA |
| Mahfouz et al/1993 | 1-Y, 2-Y, 3-Y, 4-Incomplete, 5-N, 6-N, 7-NA |
| El-Hazmi et al/ 1991 | 1-Y, 2-Y, 3-Y, 4-Y, 5-N, 6-N, 7-NA |
| El-Hazmi et al/1991 | 1-Y, 2-Y, 3-Y, 4-Y, 5-N, 6-Some, 7-NA |
| Al-Nuaim/ 1991-1993 | 1-Y, 2-Incomplete, 3-Y, 4-Y, 5-Y, 6-Some, 7-NA |
| Al-Shammari et al/ 1993-1994 | 1-Y, 2-Y, 3-Y, 4-Y, 5-Y, 6-N, 7-NA |
| Al-Mahroos & McKelcue/ 1995-1996 | 1-Y, 2-Y, 3-Y, 4-Y, 5-N, 6-N, 7-NA |
| Al-Mahroos and Al-Roomi/ NR | 1-Y, 2-Y, 3-Y, 4-Y, 5-Y, 6-N, 7-NA |
| Al-Nozha et al/ 1995-2000 | 1-Y, 2-Incomplete, 3-Y, 4-N, 5-Y, 6-N, 7-NA |
| Malik et al/ 1999-2000 | 1-Y, 2-Y, 3-Y, 4-Y, 5-Y, 6-N, 7-NA |
| Al-Asi/ 2000 | 1-Y, 2-Y, 3-Y, 4-Y, 5-N, 6-N, 7-NA |
| Al-Moosa et al/ NR | 1-Y, 2-Incomplete, 3-Y, 4-Y, 5-N, 6-Y, 7-NA |
| Moussa et al/ 2000-2002 | 1-Y, 2-Incomplete, 3-Y, 4-Y, 5-N, 6-Y, 7-NA |
| Baynouna et al/ 2004-2005 | 1-Y, 2-Y, 3-Y, 4-N, 5-Y, 6- N, 7-NA |
| Saadi et al/ 2005-2006 | 1-Y, 2-Y, 3-Y, 4-Y, 5-N, 6-Y, 7-NA |
| Bener et al/ 2009 | 1-Y, 2-Y, 3-Y, 4-Y, 5-Y, 6-Some, 7-NA |

Table S1: Quality assessment

R: rural residents; U: urban residents; SR: self-reported diagnosis; PD: previous diagnosis; CBG: capillary blood glucose; RBG: random blood glucose

Quality assessment checklist (1)

1. Was the aim of the study stated clearly?
2. Was the methodology stated? And was it appropriate?
3. Were appropriate methods used for data collection and analysis?
4. Was the data analysis sufficiently rigours?
5. Were preventive steps taken to minimize bias?
6. Were limitations of the study discussed?
7. In systematic review, was search strategy adequate and appropriate?
